# Supplementary material for: CBX6 overexpression contributes to tumor progression and is predictive of a poor prognosis in hepatocellular carcinoma
Source: PubMed Central journal article supplement (PMC5386654; doi:10.18632/oncotarget.14770), 2017-01-20
Supplement: oncotarget-08-18872-s001.pdf [file oncotarget-08-18872-s001.pdf]

# CBX6 overexpression contributes to tumor progression and is predictive of a poor prognosis in hepatocellular carcinoma

## Supplementary Materials

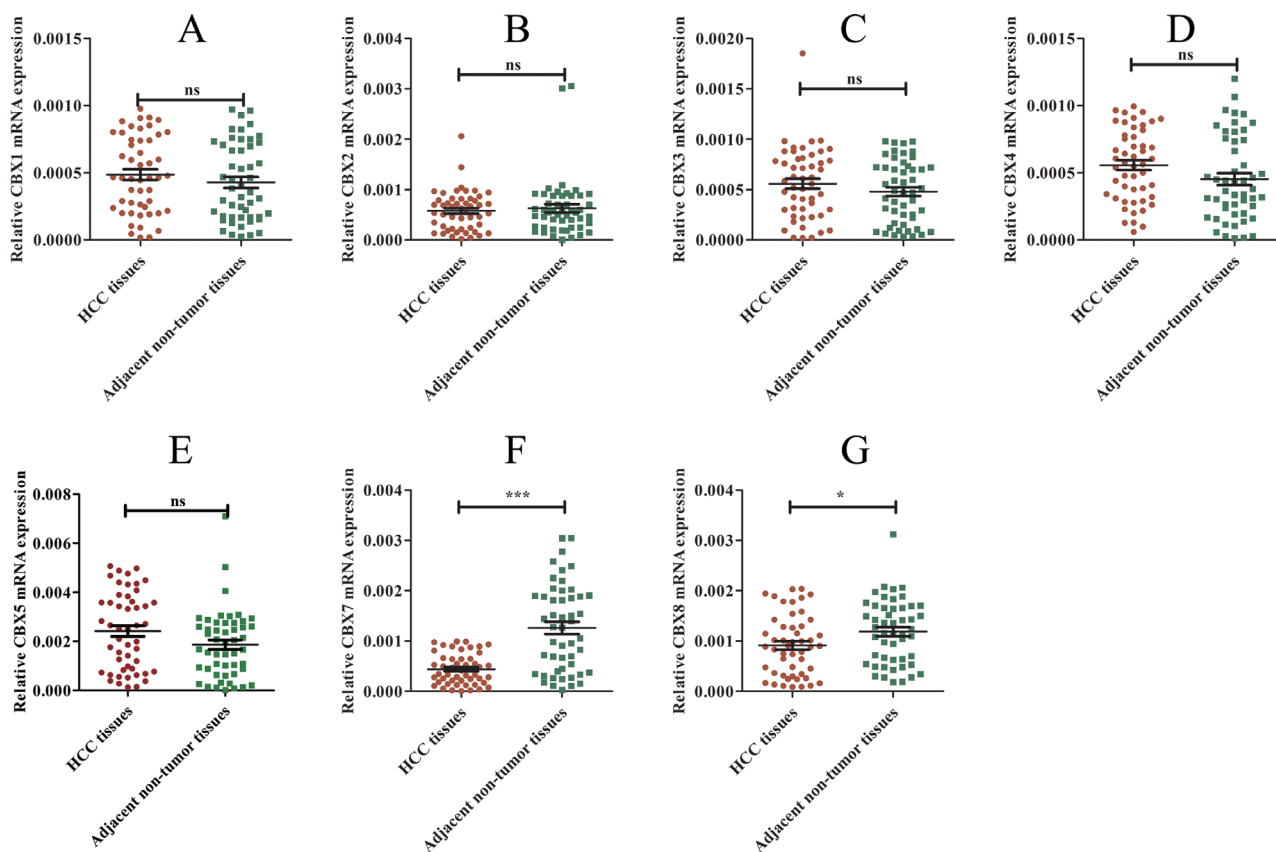

Supplementary Figure 1: CBX family protein expression was measured in HCC samples. (A–G) CBX1–5, CBX7 and CBX8 expression in 50 pairs of HCC tissues and matched adjacent non-tumor tissues was measured via real-time qPCR.

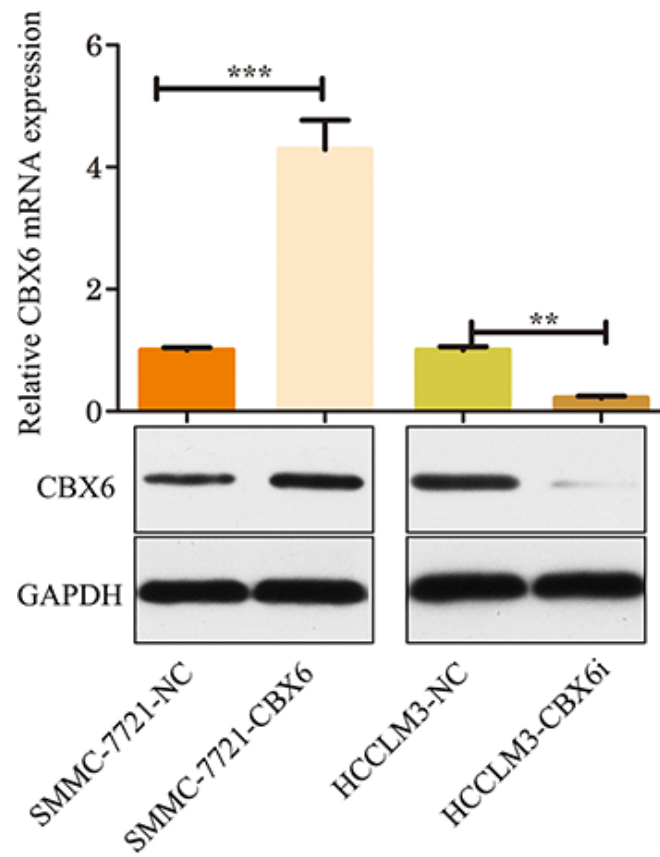

**Supplementary Figure 2: CBX6 was stably overexpressed in SMMC-7721 cells and knocked down in LM3 cells.** qRT-PCR and Western blotting were performed to assess CBX6 overexpression in SMMC-7721 cells and CBX6 knockdown in LM3 cells (\* $p < 0.05$ ; \*\* $p < 0.01$ ; \*\*\* $p < 0.001$ ).

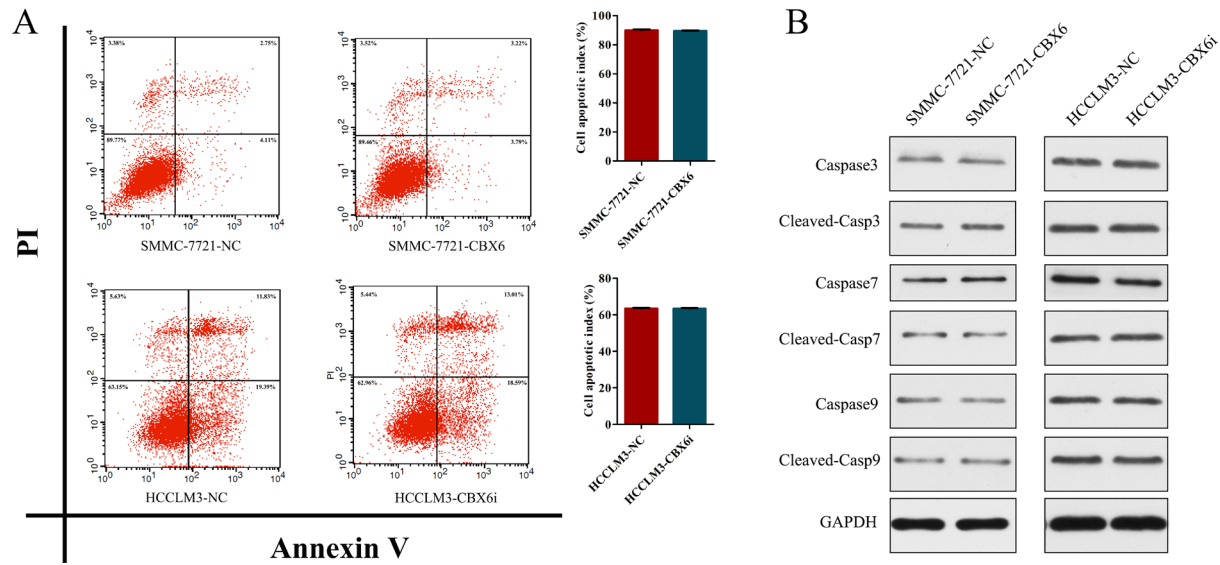

**Supplementary Figure 3: Anti-apoptotic effects of PON3 were not observed in HCC cells.** (A) Flow cytometry analysis of apoptosis using annexin V-FITC and PI staining in CBX6-overexpression and knockdown cells. (B) Western blot analysis of the expression of the apoptosis-related proteins caspase-3, 7, 9 and their respective cleavage fragments in CBX6-overexpression and knockdown cells. GAPDH was used as an internal control.

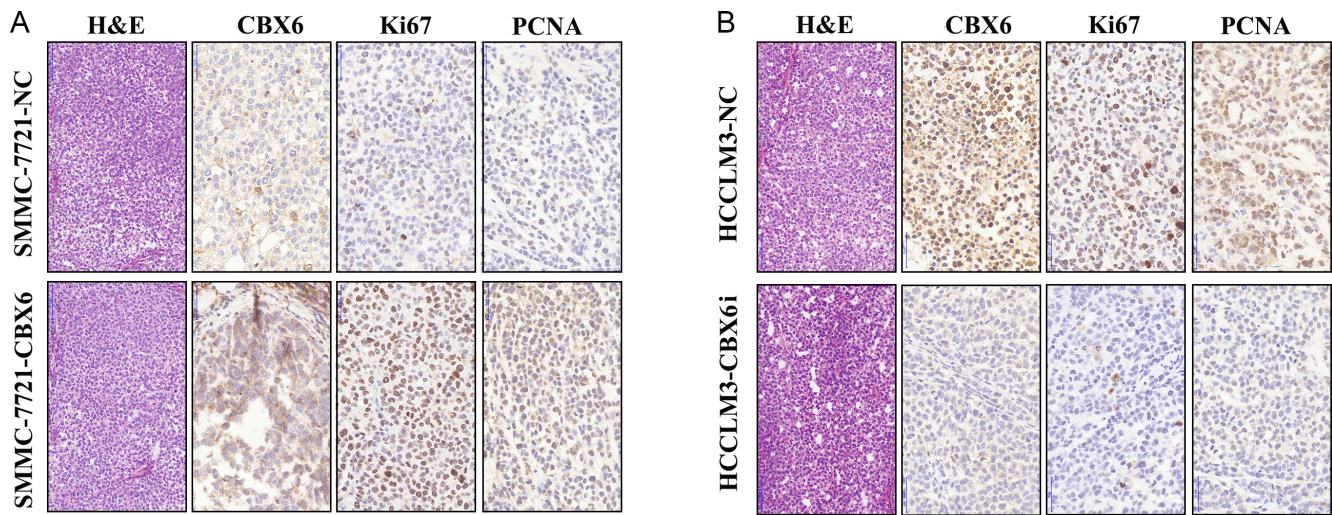

**Supplementary Figure 4: CBX6 promotes HCC tumor growth *in vivo*.** (A) H&E-stained paraffin-embedded sections obtained from the xenografts. IHC staining shows that Ki67 and PCNA expression levels were enhanced in the SMMC-7721-CBX6 group compared with the SMMC-7721-NC group. (B) H&E-stained paraffin-embedded sections obtained from the xenografts. IHC staining shows that Ki67 and PCNA expression levels were decreased in the HCCLM3-CBX6i group compared with the HCCLM3-NC group.

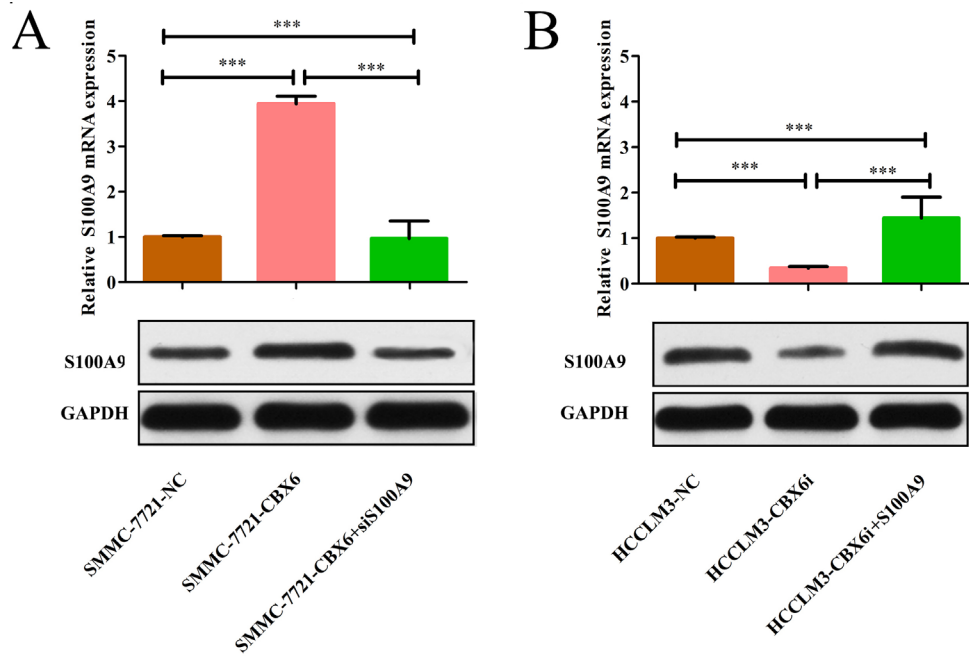

**Supplementary Figure 5: S100A9 plays a critical role in mediating CBX6 function.** (A) S100A9 mRNA and protein levels in SMMC7721 cells overexpressing S100A9 that were transduced with siS100A9 or a control vector were detected by qRT-PCR and western blotting. (B) S100A9 mRNA and protein levels in HCCLM3 CBX6-knockdown cells that were transduced with siS100A9 or a control vector were detected by qRT-PCR and western blotting ( $*p < 0.05$ ,  $**p < 0.01$ ,  $***p < 0.001$ ).

**Supplemental Table 1: Univariable analysis for recurrence free survival (RFS) and overall survival (OS)**

| Variable                                          | RFS          |             |         | OS           |             |         |
|---------------------------------------------------|--------------|-------------|---------|--------------|-------------|---------|
|                                                   | Hazard ratio | 95% CI      | P value | Hazard ratio | 95% CI      | P value |
| Age, years, $\geq 55$ vs. $< 55$                  | 1.182        | 0.879–1.591 | 0.268   | 1.072        | 0.790–1.456 | 0.655   |
| Sex, male vs. female                              | 1.139        | 0.729–1.778 | 0.568   | 1.178        | 0.746–1.860 | 0.482   |
| HBsAg, positive vs. negative                      | 1.990        | 1.191–3.327 | 0.009   | 2.067        | 1.196–3.572 | 0.009   |
| HBeAg, positive vs. negative                      | 1.633        | 1.173–2.272 | 0.004   | 1.692        | 1.211–2.364 | 0.002   |
| AFP, $\mu\text{g/L} \geq 20$ vs. $< 20$           | 1.447        | 1.059–1.977 | 0.020   | 1.363        | 0.992–1.872 | 0.056   |
| Edmondson-Steiner classification, III-IV vs. I-II | 1.578        | 0.930–2.677 | 0.091   | 1.312        | 0.784–2.196 | 0.300   |
| Tumor diameter, cm, $\geq 5$ vs. $< 5$            | 1.462        | 1.085–1.970 | 0.013   | 1.442        | 1.061–1.961 | 0.019   |
| Tumor number, multiple vs. solitary               | 1.237        | 0.873–1.751 | 0.231   | 1.336        | 0.937–1.905 | 0.109   |
| Vascular invasion, present vs. absent             | 1.566        | 1.152–2.129 | 0.004   | 1.337        | 0.979–1.826 | 0.068   |
| CBX6 expression, high vs. low                     | 1.493        | 1.115–2.000 | 0.007   | 1.626        | 1.202–2.200 | 0.002   |

**Abbreviation:** HBsAg, hepatitis B surface antigen; HBeAg, hepatitis B e antigen; AFP, alpha-fetoprotein.

**Supplementary Table 2: Primer sequences for real-time PCR**

|                 |                         |
|-----------------|-------------------------|
| CBX1, forward   | CTTGCAGAATTGGGTGTGTG    |
| CBX1, reverse   | CCTCCCTCCCCAAATAATA     |
| CBX2, forward   | GAGCTCCATCGTGCCTACTACA  |
| CBX2, reverse   | CTTCTGCGTCTCACCTTC      |
| CBX3, forward   | TTGGCAGTTTAGGACCTGCT    |
| CBX3, reverse   | TGTTCTTCCTGGCTTTTGCT    |
| CBX4, forward   | GTGAAATGGAGAGGCTGGTC    |
| CBX4, reverse   | TCTCCGATATCCCATCAGC     |
| CBX5, forward   | CAGGGTTTCTGGTGTGGTCT    |
| CBX5, reverse   | AGCAGAAGTGGGGAGTGCTA    |
| CBX6, forward   | AGATGTCACCCTGCTCCAAT    |
| CBX6, reverse   | AGCCACCTTCTCGAAATCCT    |
| CBX7, forward   | GCTGGTTTTCCCCTTTTCTC    |
| CBX7, reverse   | AAGCCTCTCTGAAGGGGAAG    |
| CBX8, forward   | GGTTCGAGAAGTACAGCACA    |
| CBX8, reverse   | TGGCTCCTCGGCTTTGACAGAGT |
| S100A9, forward | TCGTAAGTTTTGGCCTTTGC    |
| S100A9, reverse | TGGGTGCCCCAGCTTCACAGA   |
| GAPDH, forward  | AGGTGAAGGTCCGAGTCAAC    |
| GAPDH, reverse  | CGTCCTGGAAGATGGTGAT     |
